# Supplementary material for: Systematic evaluation of AML-associated antigens identifies anti-U5 SNRNP200 therapeutic antibodies for the treatment of acute myeloid leukemia
Source: PubMed Central journal article supplement (PMC10733148; doi:10.1038/s43018-023-00656-2), 2023-10-23
Supplement: 43018_2023_656_MOESM4_ESM.pdf [file 43018_2023_656_MOESM4_ESM.pdf]

Fig. 4b

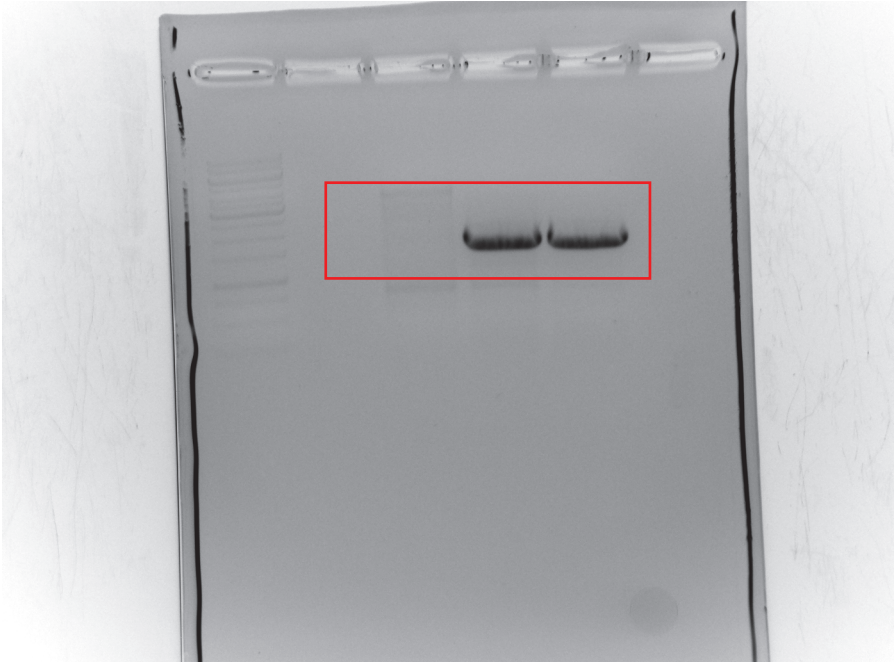

Halo tag

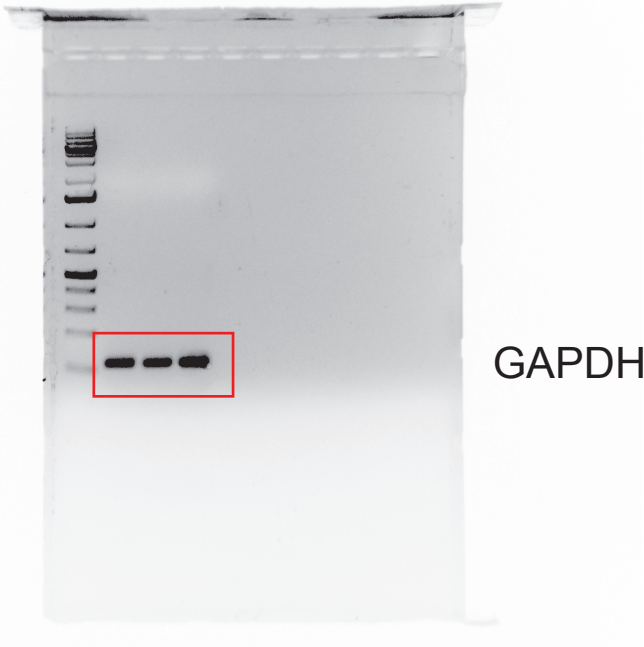

GAPDH

Fig. 4c

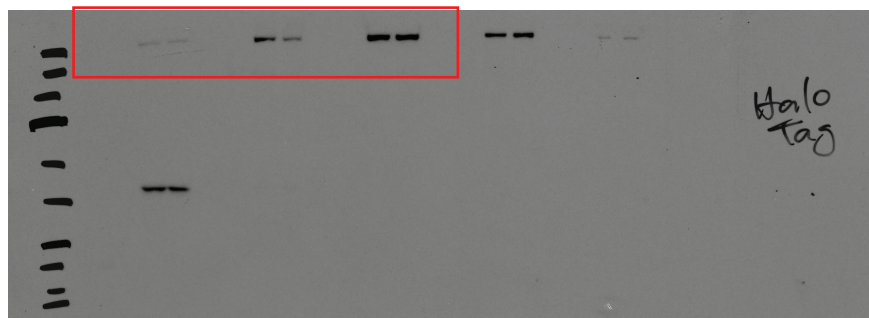

Halo  
Tag

Halo tag

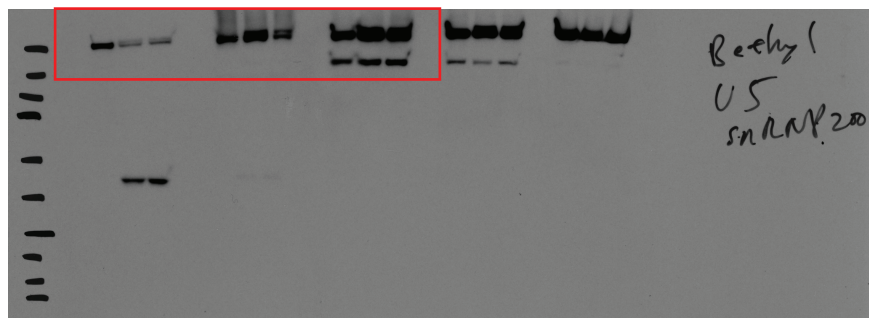

Bechy1  
U5  
snRNP200

U5 snRNP200

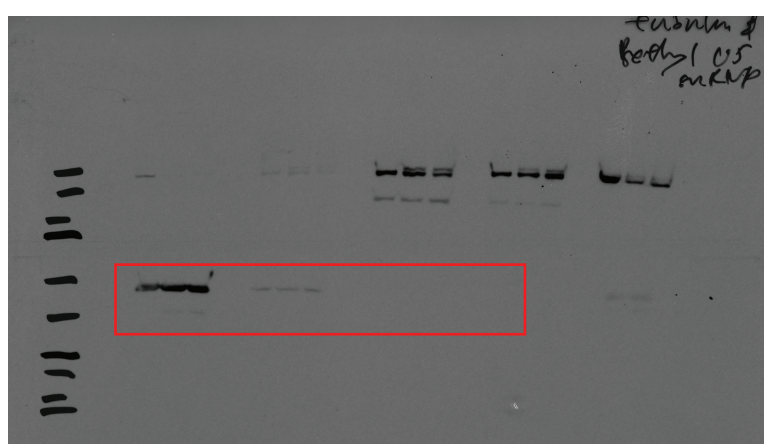

actin  
Bechy1 U5  
snRNP

Tubulin

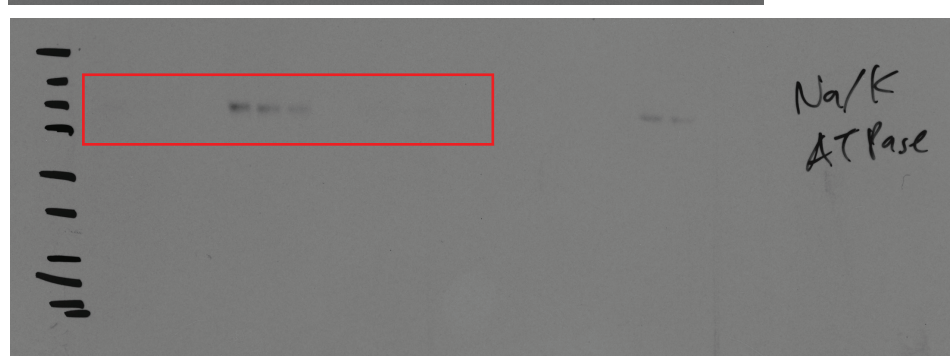

Na/K  
ATPase

Na/K ATPase

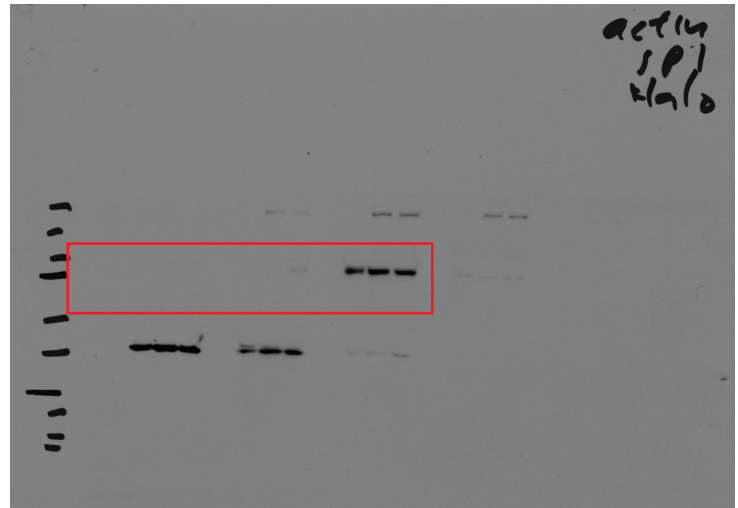

actin  
SP1  
Halo

SP1
