# Supplementary material for: Systematic evaluation of AML-associated antigens identifies anti-U5 SNRNP200 therapeutic antibodies for the treatment of acute myeloid leukemia
Source: PubMed Central journal article supplement (PMC10733148; doi:10.1038/s43018-023-00656-2), 2023-10-23
Supplement: 43018_2023_656_MOESM5_ESM.pdf [file 43018_2023_656_MOESM5_ESM.pdf]

Fig. 6c

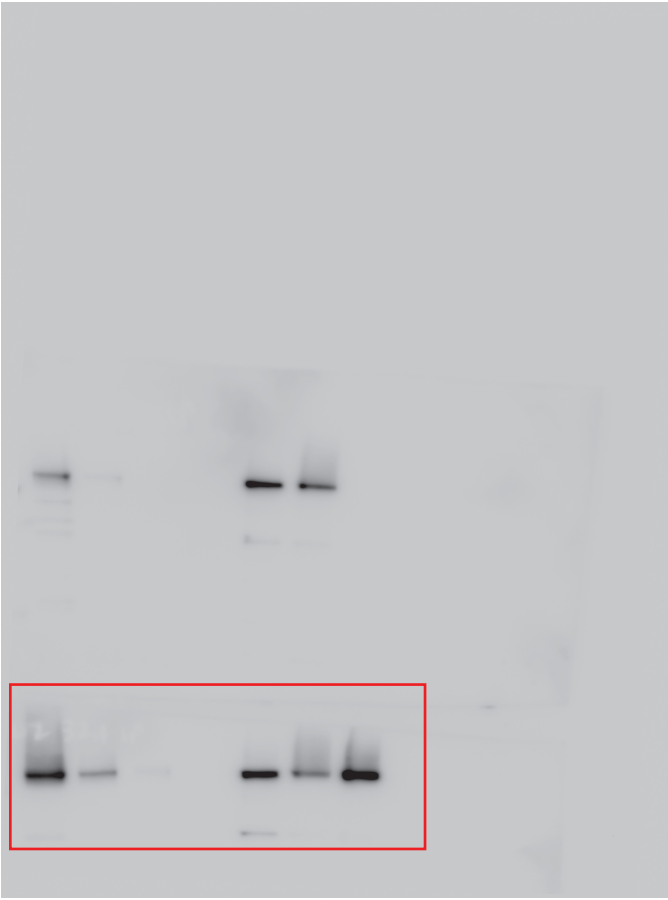

IP CD32A/WB U5 snRNP200

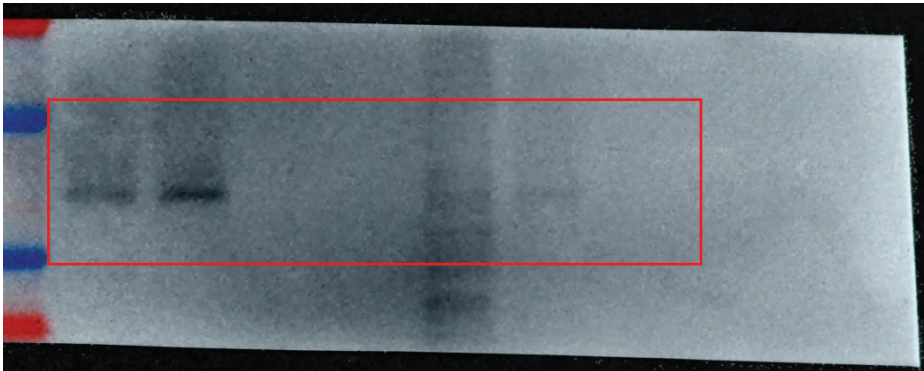

IP CD32A/WB CD32A
